# Supplementary material
Source: Springer Nature journal article supplement (https://www.springermedizin.de/resource/supplementary/12913_2013_3073_MOESM1_ESM.pdf/9532362)
Supplement: MOESM1 [file 9532362]

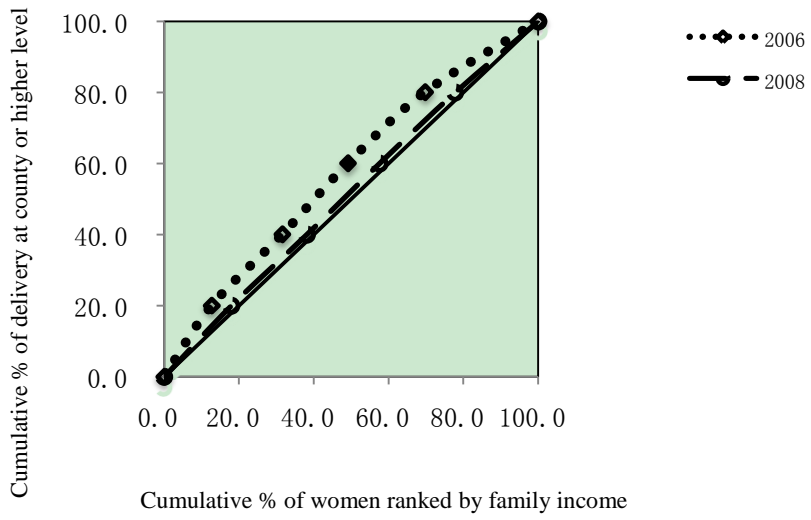

(a)

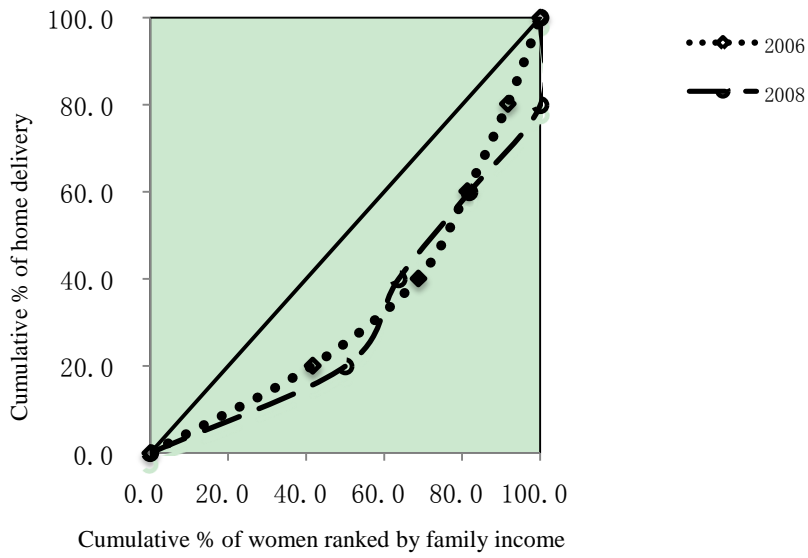

(b)

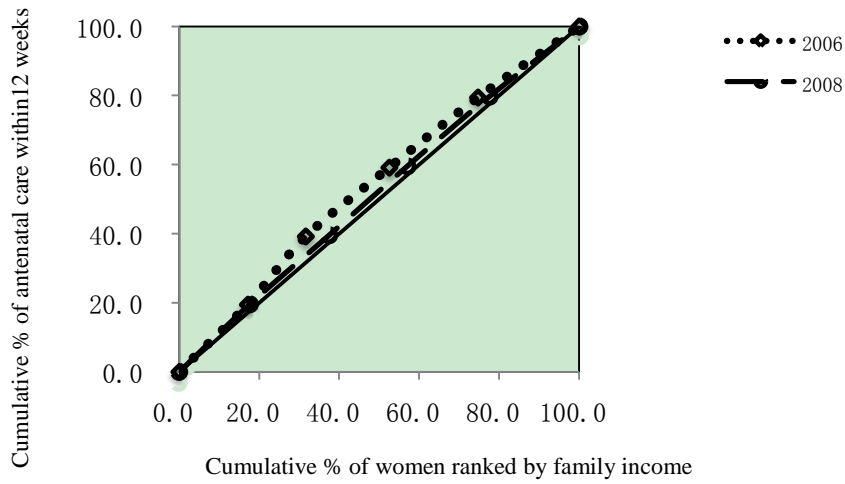

(c)

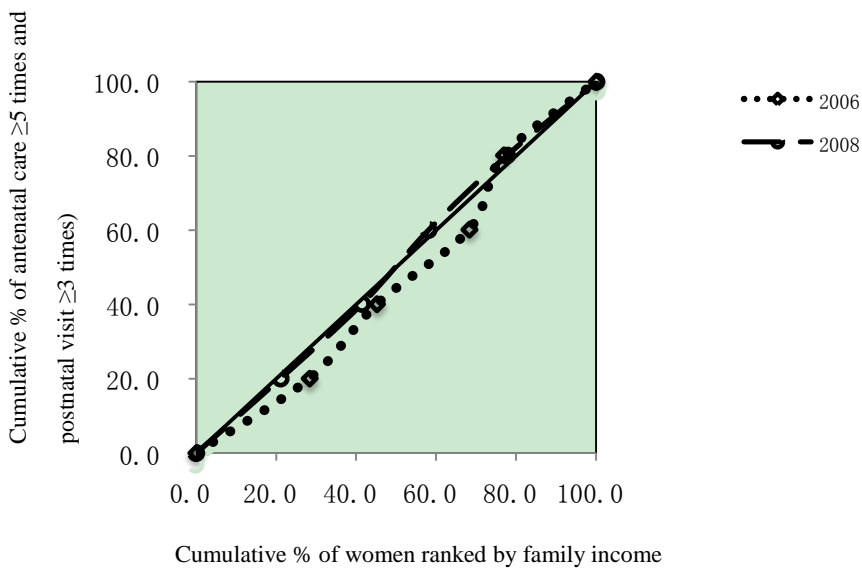

(d)

Figure 1. Concentration curves for selected indicators of health service use among Chinese women. The x-axis represents the cumulative % of related variables, and the y-axis represents the proportions of (a) delivery at a healthcare facility (county-level), (b) home delivery, (c) antenatal care 12 weeks before birth, and (d) antenatal care  $\geq 5$  times and postnatal visits  $\geq 3$  times.
